# Supplementary material for: An important role of L-fucose biosynthesis and protein fucosylation genes in Arabidopsis immunity
Source: PubMed Central journal article supplement (PMC10354811; doi:10.1111/nph.15639), 2019-01-23
Supplement: NIHMS1914007-supplement-Supplementary_Material.pdf [file NIHMS1914007-supplement-Supplementary_Material.pdf]

## ***New Phytologist* Supporting Information**

Article title: An important role of L-fucose biosynthesis and protein fucosylation genes in Arabidopsis immunity

Authors: Li Zhang, Bradley C. Paasch, Jin Chen, Brad Day and Sheng Yang He

Article acceptance date: 1 December 2018

The following Supporting Information is available for this article:

Fig. S1: Bacterial populations 1 hour after infiltration-inoculation with *Pst* DC3118.

Fig. S2: Loss of Basta resistance in the *scord6* mutant.

Fig. S3: SEM and TEM images of stomatal apertures.

Fig. S4: Mutations in the *MURI* gene affect pathogen- and SA-induced stomatal closure in Arabidopsis.

Fig. S5: ABA levels in Col-7 and the *scord6* mutant.

Fig. S6: Mutations in the *MURI* gene affect Arabidopsis apoplastic defense.

Fig. S7: Bacterial effector translocation in Col-7 and the *scord6* mutant plants.

Fig. S8: FLS2 and BAK1 abundance and sensitivity to PNGase F.

Fig. S9: Simplified diagrams of N-glycan processing and modification of O-glycan and xyloglucan.

Fig. S10: Disease assays of Arabidopsis mutants of fucosyltransferases and quintuple *della* mutant.

Table S1: List of primers.

Table S2: Summary of key assay results of the Arabidopsis mutants analyzed in this study.

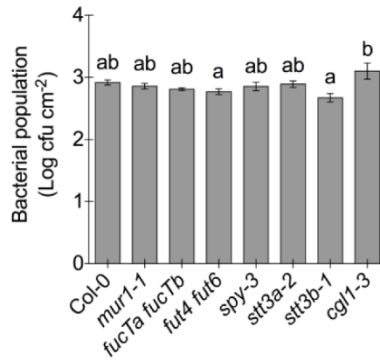

**Fig. S1:** Bacterial populations 1 hour after infiltration-inoculation with *Pst* DC3118.

Bacterial populations in *Arabidopsis* mutants were examined 1 hour after infiltration-inoculation with  $5 \times 10^5$  cfu ml<sup>-1</sup> *Pst* DC3118. Different letters above the columns indicate significant differences ( $P < 0.05$ ) of bacterial populations, analyzed by one-way ANOVA with Tukey's test ( $n = 4$ , error bars,  $\pm$  SEM).

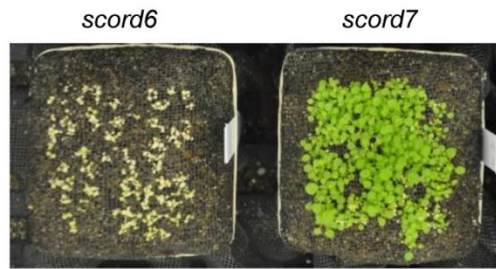

**Fig. S2:** Loss of Basta resistance in the *scord6* mutant.

Death of the *Arabidopsis scord6* mutant plants two weeks after sprayed with Basta solution ( $0.12 \text{ g l}^{-1}$ , 0.025% Silwet-77). The *scord7* mutant (Zeng *et al.* 2011) was used as a Basta-resistant control.

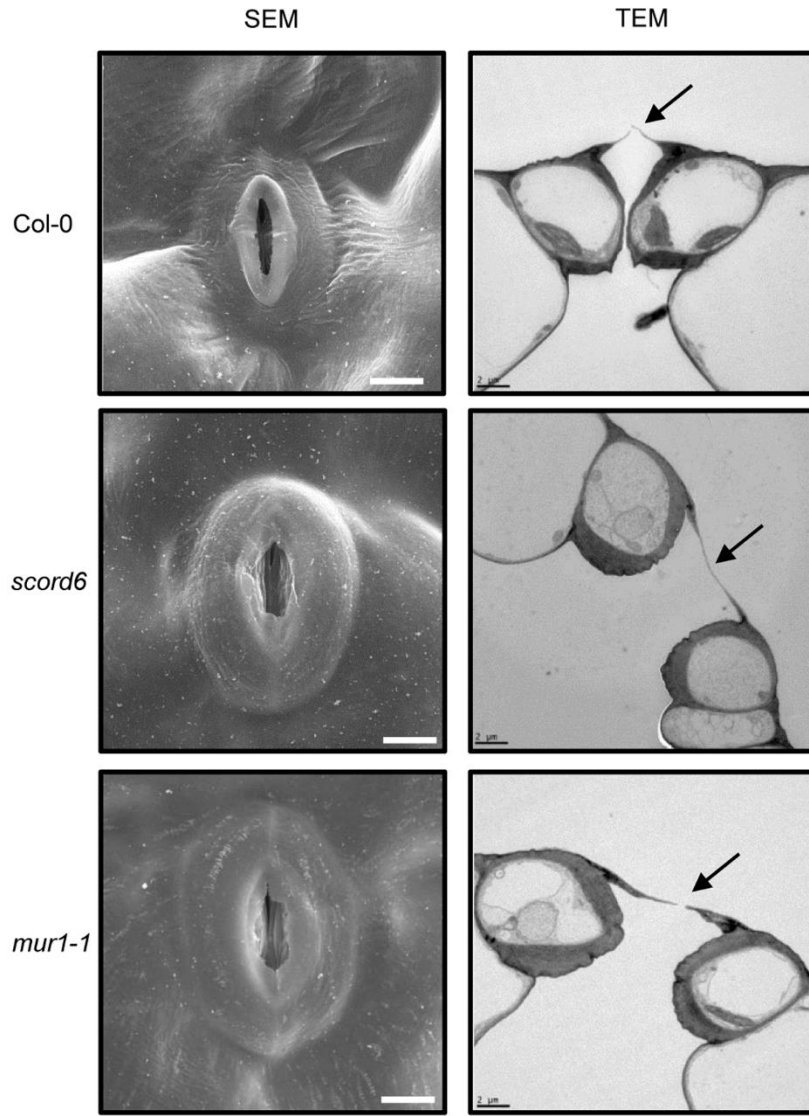

**Fig. S3:** SEM and TEM images of stomatal apertures.

Left, SEM images of *Arabidopsis* stomata, scale bar = 5  $\mu\text{m}$ . Right, TEM images of the cross sections of *Arabidopsis* stomatal guard cells, scale bar = 2  $\mu\text{m}$ . Arrows indicate the merging point of the outer cuticular ledges of two guard cells.

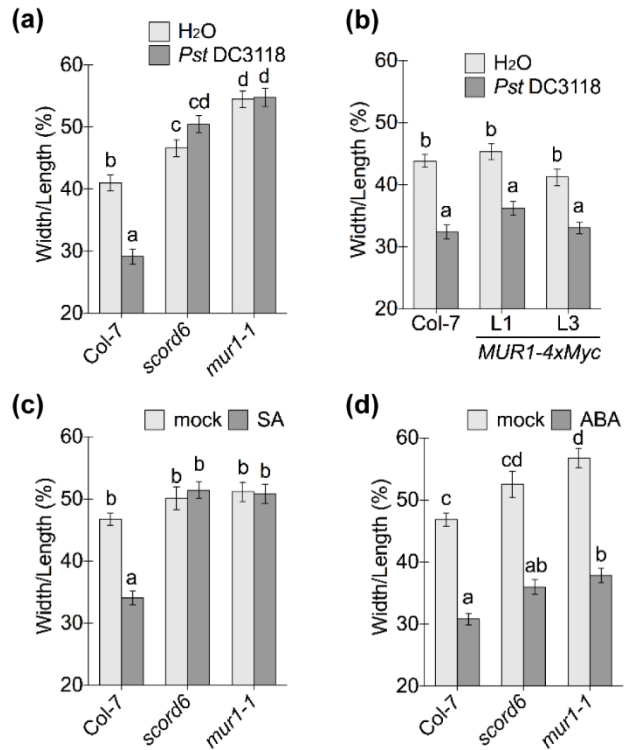

**Fig. S4:** Mutations in the *MURI* gene affect pathogen- and SA-induced stomatal closure in Arabidopsis.

(a, b) Stomatal apertures two hours after leaves were inoculated with  $1 \times 10^8$  cfu ml<sup>-1</sup> *Pst* DC3118 or water (mock). Different letters above columns indicate significant differences ( $P < 0.05$ ) between stomatal apertures ( $n > 30$ , error bars,  $\pm$  SEM), analyzed by two-way ANOVA with Tukey's test.

(c, d) Stomatal apertures one hour after leaves have been exposed to 100 μM SA (c), 10 μM ABA (d) or MES buffer (mock) treatments. Different letters above columns indicate significant differences ( $P < 0.05$ ) between stomatal apertures ( $n > 30$ , error bars,  $\pm$  SEM), analyzed by two-way ANOVA with Tukey's test.

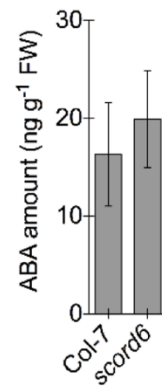

**Fig. S5:** ABA levels in Col-7 and the *scord6* mutant.

Hormone levels of ABA in Arabidopsis plants Col-7 and the *scord6* mutant. No significant differences were detected between the hormone levels of Col-7 and the *scord6* mutant, via Student's t-test (n = 6, error bars,  $\pm$  SEM).

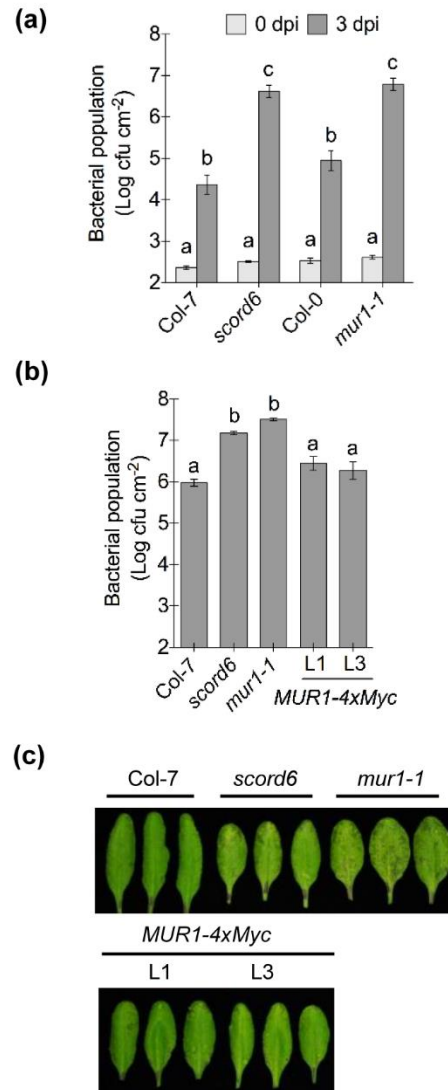

**Fig. S6:** Mutations in the *MURI* gene affect Arabidopsis apoplastic defense.

(a) Bacterial populations 1 hour (Day 0) or 3 days (Day 3) after infiltration-inoculation (into the leaf apoplast) with  $1 \times 10^5$  cfu ml<sup>-1</sup> *Pst* DC3118. Different letters above the columns indicate significant differences ( $P < 0.05$ ) of bacterial populations, analyzed by two-way ANOVA with Tukey's test ( $n = 4$ , error bars,  $\pm$  SEM).

(b, c) Bacterial populations (b) and disease symptoms (c) three days after infiltration-inoculation (into the leaf apoplast) with  $1 \times 10^5$  cfu ml<sup>-1</sup> *Pst* DC3118. Different letters above the columns indicate significant differences ( $P < 0.05$ ) of bacterial populations between plant genotypes by one-way ANOVA with Tukey's test ( $n = 4$ , error bars,  $\pm$  SEM).

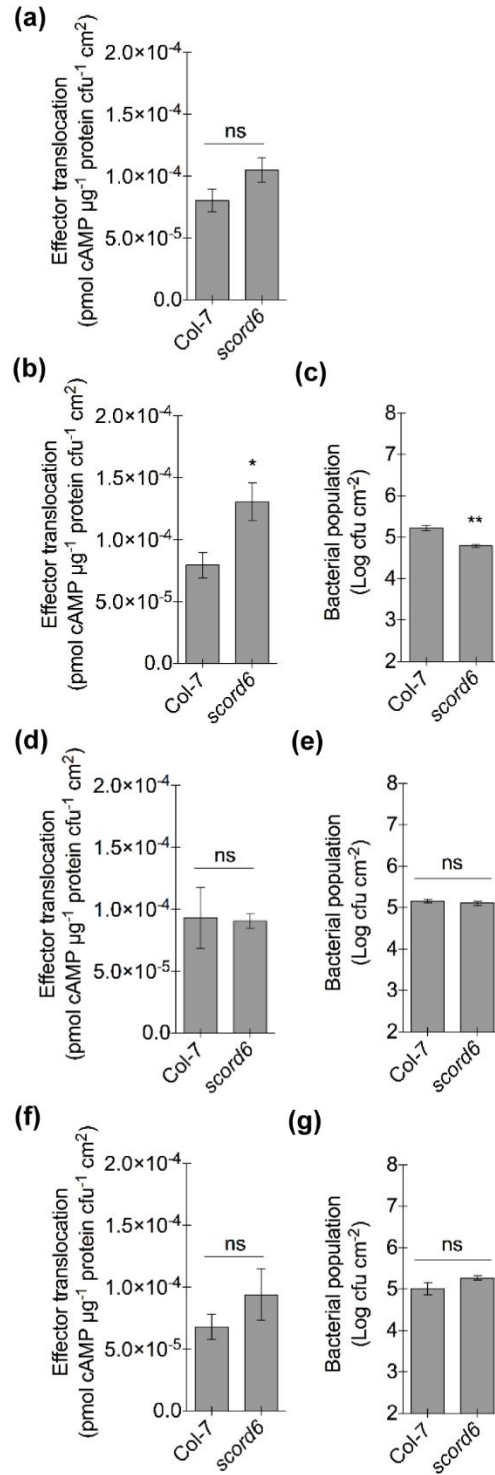

**Fig. S7:** Bacterial effector translocation in Col-7 and the *scord6* mutant plants.

(a) Pooled bacterial effector translocation data from three experimental repeats with total  $n = 12$  (4 biological replicates [Arabidopsis plants] per experiment). Error bars,  $\pm$  SEM. No significant



differences were detected, as analyzed by Student's t-test. The bacterial effector translocation was examined seven hours post inoculation with *Pst* DC3000 carrying the  $P_{nptII}::avrPto-CyaA$  plasmid. Translocation of effector protein AvrPto was represented by the cAMP amount (pmol cAMP  $\mu\text{g}^{-1}$  protein) divided by the corresponding bacterial number (cfu  $\text{cm}^{-2}$ ) in each sample.

(b-g) Three different experimental repeats of the bacterial effector translocation in Col-7 and the *scord6* mutant (b, d, f), and the corresponding bacterial populations seven hours after infiltration-inoculation (c, e, g) (n = 4; error bars,  $\pm$  SEM). \* $0.01 < P < 0.05$  indicates a significant difference of cAMP amounts between wild-type Col-7 and the *scord6* mutant, as analyzed by Student's t-test; ns: not significant. \*\* $0.001 < P < 0.01$  indicates a significant difference of bacterial populations between wild-type Col-7 and the *scord6* mutant, as analyzed by Student's t-test; ns: not significant.

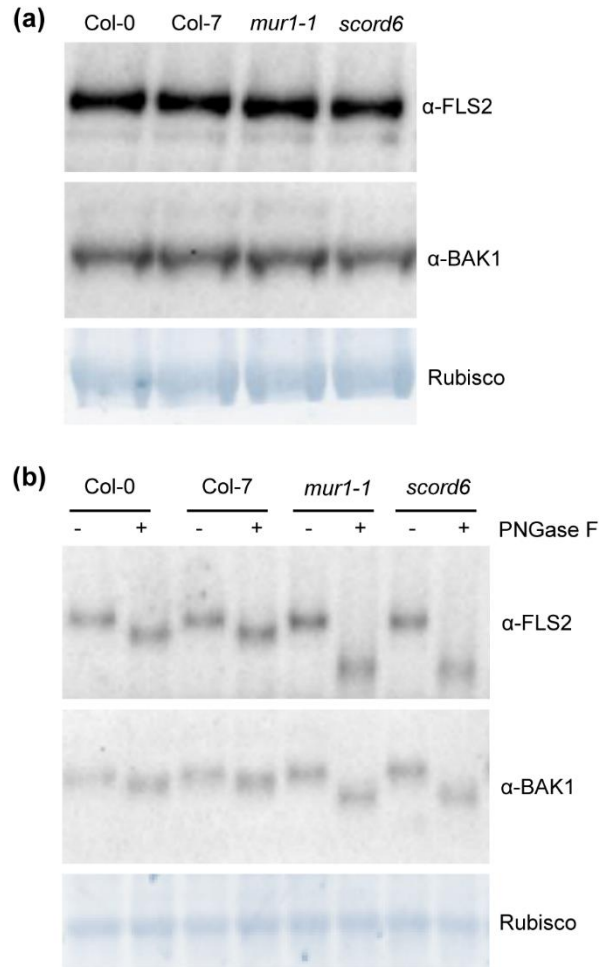

**Fig. S8:** FLS2 and BAK1 abundance and sensitivity to PNGase F.

(a) The first two panels: Western blot of total Arabidopsis leaf proteins for FLS2 and BAK1 in wild-type, *scord6* and *mur1-1* mutant plants using  $\alpha$ -FLS2 and  $\alpha$ -BAK1 antibodies. Lower panel: Naphthol Blue Black staining of gel showing the Rubisco large subunit as a loading control.

(b) The first two panels: Western blot of total Arabidopsis leaf proteins for FLS2 and BAK1 after PNGase F. Lower panel: Naphthol Blue Black staining of gel showing the Rubisco large subunit as a loading control. Please note that FLS2 and BAK1 proteins showed a larger decrease in the MWs of FLS2 and BAK1 after PNGase F. In contrast, FLS2 and BAK1 in wild-type plants were less sensitive to PNGase F treatment, as indicated by a smaller decrease in the MWs of FLS2 and BAK1.

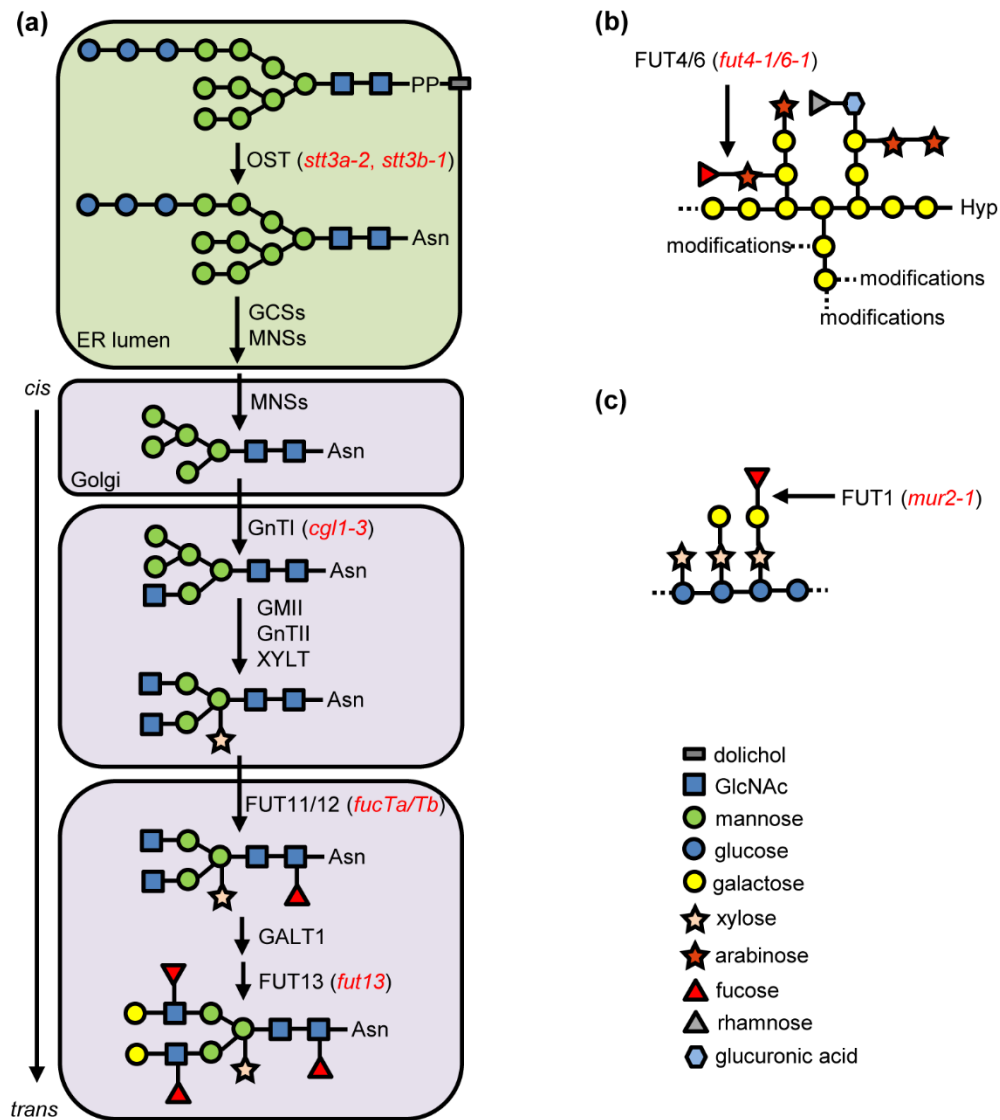

**Fig. S9:** Simplified diagrams of *N*-glycan processing and modification of *O*-glycan and xyloglucan.

(a) A simplified schematic diagram of *N*-glycan processing in the endoplasmic reticulum (ER) and Golgi (Strasser 2016). The OST complex catalyzes the transfer of a pre-assembled oligosaccharide from the lipid carrier dolichol pyrophosphate to a selected asparagine residue of the nascent polypeptide (Strasser 2016).

(b) A simplified schematic diagram of *O*-glycans attached to arabinogalactan proteins.

(c) A simplified schematic diagram of the XLFG (glucose/xylose/galactose/fucose) subunit of xyloglucan.

Arabidopsis mutants used for disease assays and stomatal assays are indicated in red with parentheses.

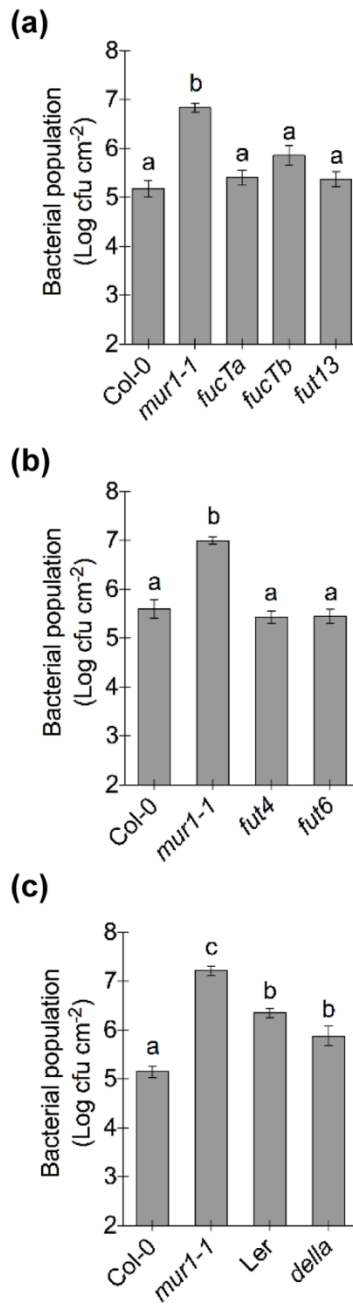

**Fig. S10:** Disease assays of Arabidopsis mutants of fucosyltransferases and quintuple *della* mutant.

Bacterial populations three days after dip-inoculation with  $1 \times 10^8$  cfu ml<sup>-1</sup> *Pst* DC3118 in fucosyltransferase single mutants for *N*-glycan (a) or *O*-glycan (b), or quintuple *della* mutant (c). Different letters above the columns indicate significant differences ( $P < 0.05$ ) of bacterial

populations between genotypes by one-way ANOVA with Tukey's test ( $n = 4$ , error bars,  $\pm$  SEM).

**Table S1:** List of primers.

| name of primer           | accession number | sequence                                                                                                         | purpose                                   | reference for primer                | ABRC         |
|--------------------------|------------------|------------------------------------------------------------------------------------------------------------------|-------------------------------------------|-------------------------------------|--------------|
| SCORD6_FP<br>SCORD6_RP   | AT3G51160        | ATGGCGTCAGAGAACAACGGAT<br>AGGTTGCTGCTTAGCATCCATGTAT                                                              | <i>scord6</i><br>deletion<br>confirmation |                                     |              |
| SCORD6_BPF<br>SCORD6_BPR | AT3G51160        | GGGGACAAGTTTGTACAAAAAAGCAGGCTTCATGGCGTCAGAGAACAACGGAT<br>GGGGACCACTTTGTACAAGAAAGCTGGGTCAGGTTGCTGCTTAGCATCCATGTAT | cloning<br><i>SCORD6</i><br>gene          |                                     |              |
| PP2AA3_qF<br>PP2AA3_qR   | AT1G13320        | GGTTACAAGACAAGGTTCACTC<br>CATTCAAGACCAAACCTCTTCAG                                                                | qPCR                                      | Zhang <i>et al.</i> 2015            |              |
| CYP81F2_qF<br>CYP81F2_qR | AT5G57220        | GCCCGAGAAGTTTATGCCTGAG<br>CAACGAACCTAAAGCCAACAATACC                                                              | qPCR                                      | J. Li <i>et al.</i> 2009            |              |
| FRK1_qF<br>FRK1_qR       | AT2G19190        | CATTAGATGCAGCGCAAGGAC<br>GGTTGGCCTGTAATCACTTC                                                                    | qPCR                                      |                                     |              |
| mur1-1_F<br>mur1-1_R     | AT3G51160        | ATGGCGTCAGAGAACAACGGAT<br>AGGTTGCTGCTTAGCATCCATGTAT                                                              | genomic<br>PCR                            |                                     | CS6243       |
| mur2-1_F<br>mur2-1_R     | AT2G03220        | TCGGTGAGTGACTTTAGAGTCT<br>AATCATACTAGCTTAAGTCCCCA                                                                | genomic<br>PCR                            |                                     | CS8565       |
| fut4_F<br>fut4_R         | AT2G15390        | CCATGTAGTTACATTCCCAACCG<br>CCACGTCGATGGAGCCTTGTTT                                                                | genomic<br>PCR                            | Liang <i>et al.</i> 2013            | SAIL_284_B05 |
| fut6_F<br>fut6_R         | AT1G14080        | CACATCTTTCAGATCTCCAGCG<br>CTTCTTGTAAGCATCCGTGC                                                                   | genomic<br>PCR                            | Liang <i>et al.</i> 2013            | SALK_099500  |
| fucTa_F<br>fucTa_R       | AT3G19280        | TGCCACAACCTTAGCATCTCCT<br>TAGGACCTCGAAGATTGGAGA                                                                  | genomic<br>PCR                            | Kaulfurst-Soboll <i>et al.</i> 2011 | SALK_087481  |
| fucTb_F<br>fucTb_R       | AT1G49710        | ATGAAGTATCTCGCAGCTAAC<br>AATGTGACTACTTAGACTCGA                                                                   | genomic<br>PCR                            | Kaulfurst-Soboll <i>et al.</i> 2011 | SALK_063355  |
| fut13-2_F<br>fut13-2_R   | AT1G71990        | ACATCGTCTTTCGCATGGTAG<br>GAGGATCTCCGGTGGTTTAAG                                                                   | genomic<br>PCR                            | Anderson <i>et al.</i> 2012         | SALK_067444  |
| cgl1-3_F<br>cgl1-3_R     | AT4G38240        | CGTGCAGACTATCTTG<br>CCATTATCATCCATGATGAAGC                                                                       | genomic<br>PCR                            | Frank <i>et al.</i> 2008            | SALK_073650  |
| stt3a-2_F<br>stt3a-2_R   | AT5G19690        | ATTGCAAGTGTCAGTGAACATCAAC<br>CCTTGTCAGTCTTACCAGCAGAA                                                             | genomic<br>PCR                            | Koiwa <i>et al.</i> 2003            | SALK_058814  |
| stt3b-1_F<br>stt3b-1_R   | AT1G34130        | ACTTGATGTGAACTATGTATTGGTCCG<br>GGTTCTTTGATCACTGGGAATACTC                                                         | genomic<br>PCR                            | Koiwa <i>et al.</i> 2003            | SALK_033391  |
| spy-3_F<br>spy-3_R       | AT3G11540        | ATCATTGGTCTCTCATGGCTT<br>TGTGACAAAGCCATTAGAAAAGC                                                                 | genomic<br>PCR                            |                                     | CS6268       |
| spy-5_F<br>spy-5_R       | AT3G11540        | TCAGTACATGCTCATAATGTTGGT<br>TTCCAGATGGGTCAAGACTC                                                                 | genomic<br>PCR                            |                                     | CS8094       |
| LB3                      |                  | TAGCATCTGAATTTTCATAACCAATCTCGATACAC                                                                              | T-DNA                                     |                                     |              |

|        |  |                   |       |  |  |
|--------|--|-------------------|-------|--|--|
| LBb1.3 |  | ATTTGCCGATTCGGAAC | T-DNA |  |  |
|--------|--|-------------------|-------|--|--|



**Table S2:** Summary of key assay results of the Arabidopsis mutants analyzed in this study

| Mutant                | Function of gene                                                  | Arabidopsis defense       | Stomatal defense          | Apoplastic defense        |     |     |
|-----------------------|-------------------------------------------------------------------|---------------------------|---------------------------|---------------------------|-----|-----|
|                       |                                                                   | against <i>Pst</i> DC3118 | against <i>Pst</i> DC3118 | against <i>Pst</i> DC3118 | PTI | ETI |
| <i>scord6, mur1-1</i> | GDP-D-mannose-4,6-dehydratase                                     | -                         | -                         | -                         | -   | -   |
| <i>fucTa fucTb</i>    | $\alpha$ 1,3-fucosyltransferases for N-glycan processing in Golgi | -                         | -                         | -                         |     |     |
| <i>fut13</i>          | $\alpha$ 1,4-fucosyltransferase for N-glycan processing in Golgi  | +                         |                           |                           |     |     |
| <i>stt3a-2</i>        | putative subunits of OST complex in ER                            | -                         | -                         | -                         |     |     |
| <i>stt3b-1</i>        | putative subunits of OST complex in ER                            | -                         | -                         | -                         |     |     |
| <i>cgl1-3</i>         | GnTI in Golgi                                                     | -                         | -                         | -                         |     |     |
| <i>fut4 fut6</i>      | arabinogalactan-protein specific $\alpha$ 1,2-fucosyltransferase  | -                         | +                         | -                         |     |     |
| <i>spy-3, spy-5</i>   | <i>O</i> -fucosyltransferase for mono-fucosylation of DELLAs      | -                         | -*                        | -                         |     |     |
| <i>mur2-1</i>         | XyG specific $\alpha$ 1,2-fucosyltransferase                      | +                         |                           |                           |     |     |
| <i>della</i>          | repressors of GA signaling                                        | +                         |                           |                           |     |     |

+: Wild-type resistance

-: Compromised resistance

\*: Only tested in the *spy-3* mutant

## References

- Anderson CT, Wallace IS, Somerville CR. 2012.** Metabolic click-labeling with a fucose analog reveals pectin delivery, architecture, and dynamics in *Arabidopsis* cell walls. *Proceedings of the National Academy of Sciences of the United States of America* **109**: 1329-1334
- Frank J, Kaulfurst-Soboll H, Rips S, Koiwa H, von Schaewen A. 2008.** Comparative analyses of *Arabidopsis complex glycan1* mutants and genetic interaction with *staurosporin* and *temperature sensitive3a*. *Plant Physiology* **148**: 1354-1367
- Kaulfurst-Soboll H, Rips S, Koiwa H, Kajiura H, Fujiyama K, von Schaewen. 2011.** Reduced immunogenicity of *Arabidopsis hgl1* mutant *N*-glycans caused by altered accessibility of xylose and core fucose epitopes. *The Journal of Biological Chemistry* **286**: 22955-22964
- Koiwa H, Li F, McCully MG, Mendoza I, Koizumi N, Manabe Y, Nakagawa Y, Zhu J, Rus A, Pardo JM, et al. 2003.** The STT3a subunit isoform of the *Arabidopsis* oligosaccharyltransferase controls adaptive responses to salt/osmotic stress. *The Plant Cell* **15**: 2273-2284
- Li J, Zhao-Hui C, Batoux M, Nekrasov V, Roux M, Chinchilla D, Zipfel C, Jones JD. 2009.** Specific ER quality control components required for biogenesis of the plant innate immune receptor EFR. *Proceedings of the National Academy of Sciences of the United States of America* **106**: 15973-15978
- Liang Y, Basu D, Pattathil S, Xu WL, Venetos A, Martin SL, Faik A, Hahn MG, Showalter AM. 2013.** Biochemical and physiological characterization of *fut4* and *fut6* mutants defective in arabinogalactan-protein fucosylation in *Arabidopsis*. *Journal of Experimental Botany* **64**: 5537-5551
- Strasser R. 2016.** Plant protein glycosylation. *Glycobiology* **26**: 926-939
- Zeng W, Brutus A, Kremer JM, Withers JC, Gao X, Jones AD, He SY. 2011.** A genetic screen reveals *Arabidopsis* stomatal and/or apoplastic defenses against *Pseudomonas syringae* pv. *tomato* DC3000. *PLoS Pathogens* **7**: e1002291
- Zhang L, Yao J, Withers J, Xin XF, Banerjee R, Fariduddin Q, Nakamura Y, Nomura K,**

**Howe GA, Boland W, et al. 2015.** Host target modification as a strategy to counter pathogen hijacking of the jasmonate hormone receptor. *Proceedings of the National Academy of Sciences United States of America* **112**: 14354–14359
